# Supplementary material
Source: PubMed Central journal article supplement (PMC10248835)

## SUPPLEMENTARY METHODS

### *Difference-in-Differences Analyses*

We compared changes in 2-year overall survival from 2011-2013 to 2015-2018 between Medicaid expansion and non-expansion states. The 2-year endpoint was selected to be similar to the median follow-up time (21 months for individuals diagnosed in 2015-2018). Changes were evaluated using linear regression models, where the outcome variable, 2-year overall survival, was estimated using the pseudo-observation method. This method estimates each individual observation's contribution to the total 2-year overall survival as measured in a Kaplan-Meier curve. This is done by estimating the 2-year overall survival for the overall sample and for the sample excluding an observation  $j$ ; the pseudo-observation is equal to the weighted difference between those two values:  $(N)*2\text{-yr-OS}_{\text{full sample}} - (N-1)*2\text{-yr-OS}_{\text{sample excluding } j}$ .<sup>1</sup> Estimation was done using the jackknife function from the R `prodlim` package. Since censoring is related to the year of diagnosis, which defines the pre- and post-expansion periods, we utilized a mixture estimator, where the pseudo-observations were calculated for the observations from the pre- and post-expansion periods separately.<sup>1</sup> Note that because of requirement of a mixture estimator, our endpoint was limited by the 2015-2018 period, precluding analysis of other endpoints (e.g. 5-year overall survival). The linear regression model was constructed in the following manner:

$$2\text{-yr-OS} = \text{state} + \text{year} + (\text{expansion\_state} * \text{post\_period}) + \text{covariates}.$$

Where state refers to a set of dummy binary indicator variables for each state, year is a set of dummy binary indicator variables for each year, expansion\_state is a binary variable indicating whether or not a given individual resided in a state that expanded Medicaid by 2014, post\_period is a binary variable indicating whether a given individual was diagnosed after 2014, and covariates including basic demographic information as well as factors associated with access to care and/or cancer outcomes, including age, race/ethnicity, sex, metropolitan residence, cancer type, and stage at diagnosis. The estimate of interest in difference-in-differences analyses is the interaction term between expansion\_state and post\_period. We used robust standard errors clustered by state for all analyses.

#### *Testing of the parallel trends assumption*

Difference-in-differences analyses require that in the absence of the intervention (in this case, Medicaid expansion) that the trends in the outcome (overall survival in this case) would have been parallel between the two comparison groups. While this cannot be known, the pre-expansion period can give insight into the temporal trends in the two groups. We first visually assessed the temporal trends between the two groups. We then formally tested for year-by-year differential changes between state groups in the pre-expansion period. To do so, we generated linear regression models of the following design:

$$2\text{-yr-OS} = \text{state} + \text{year} + (\text{expansion\_state} * \text{year}) + \text{covariates}.$$

In this manner, changes relative to baseline, defined as 2013 since it was the year prior to expansion (i.e. changes from 2011 to 2013, and changes from 2012 to 2013) could be made. If the interaction term suggested differential temporal trends by state, we would conclude that the

temporal trends between the groups were not parallel. Otherwise, we considered the parallel trends assumption satisfied. Note that this approach resembles an event study analysis, except that the sample was limited to the pre-expansion period rather than inclusive of the full sample.

Full results are given in Supplementary Table 2. Briefly, all analyses satisfied the above conditions with the exception of the subgroup analyses for renal tumors, which had a steady decline in OS in non-expansion states on visual inspection, and for 10-14 year-old children, metropolitan residents, residents of counties with the highest quartile of county income, and children with retinoblastoma, which had statistically significant divergences between state groups in our formal testing. These subgroup analyses should be interpreted with caution.

## SUPPLEMENTARY RESULTS

### *Sensitivity analysis including stage at diagnosis as a covariate*

After including stage at diagnosis as a covariate in our difference-in-differences analysis, there was a similar effect suggesting increased 2-year OS in Medicaid expansion relative to non-expansion states (1.51 percentage points, 95% CI = 0.42 to 2.60, P=0.010).

Results from other sensitivity analyses are given in Supplementary Table 5.

## References

1. Andersen PK, Pohar Perme M. Pseudo-observations in survival analysis. *Stat Methods Med Res.* 2010;19(1):71-99. doi:10.1177/0962280209105020

## SUPPLEMENTARY RESULTS

Supplementary Table 1: States included in the study sample

| State          | No.  | Medicaid Expansion Status |
|----------------|------|---------------------------|
| Alabama        | 1013 | Non-Expansion             |
| Alaska         | 0    | Excluded <sup>a</sup>     |
| Arizona        | 1426 | Expansion                 |
| Arkansas       | 587  | Expansion                 |
| California     | 7989 | Expansion <sup>b</sup>    |
| Colorado       | 723  | Expansion                 |
| Delaware       | 206  | Expansion                 |
| Florida        | 3830 | Non-Expansion             |
| Georgia        | 2260 | Non-Expansion             |
| Idaho          | 375  | Non-Expansion             |
| Illinois       | 2690 | Expansion                 |
| Kansas         | 593  | Non-Expansion             |
| Kentucky       | 1049 | Expansion                 |
| Louisiana      | 0    | Excluded <sup>a</sup>     |
| Maine          | 231  | Non-Expansion             |
| Maryland       | 1053 | Expansion                 |
| Minnesota      | 0    | Excluded <sup>c</sup>     |
| Mississippi    | 580  | Non-Expansion             |
| Missouri       | 1245 | Non-Expansion             |
| Montana        | 0    | Excluded <sup>a</sup>     |
| Nebraska       | 474  | Non-Expansion             |
| Nevada         | 531  | Expansion                 |
| New Hampshire  | 233  | Expansion                 |
| New Jersey     | 1902 | Expansion <sup>b</sup>    |
| New York       | 2035 | Expansion                 |
| North Carolina | 2033 | Non-Expansion             |
| North Dakota   | 128  | Expansion                 |
| Ohio           | 2312 | Expansion                 |
| Oklahoma       | 797  | Non-Expansion             |
| Oregon         | 814  | Expansion                 |
| Pennsylvania   | 0    | Excluded <sup>a</sup>     |
| Rhode Island   | 203  | Expansion                 |
| South Carolina | 892  | Non-Expansion             |
| South Dakota   | 173  | Non-Expansion             |
| Tennessee      | 1352 | Non-Expansion             |
| Vermont        | 108  | Expansion                 |
| Washington     | 1533 | Expansion <sup>b</sup>    |
| West Virginia  | 326  | Expansion                 |
| Wisconsin      | 1175 | Non-Expansion             |
| Wyoming        | 99   | Non-Expansion             |

<sup>a</sup>State expanded Medicaid later in the study period (2015-2017) and were excluded from the main analyses. These states were included in a sensitivity analysis, however, with a modified post-expansion period based on the year of expansion.

<sup>b</sup>State enacted a relatively limited Medicaid eligibility expansion during 2010 to 2011. These states were not treated differently in our main analyses, but we conducted a sensitivity analysis including additional pre-expansion data (encompassing 2009-2018) and adjusting for early Medicaid expansion status.

<sup>c</sup>State had unavailable county income information and was excluded from (adjusted) difference-in-differences analyses. Note that Minnesota was among the states adopting early Medicaid expansion measures.

States for which no information was available for the present analysis include Connecticut, Massachusetts, Hawaii, Indiana, Michigan, New Mexico, Texas, Utah, and Virginia.

Supplementary Table 2: Tests of the parallel trends assumption. (CBTRUS: Data provided by CDC's National Program of Cancer Registries, 2011-2018)

| Subgroup                                                           | 2011 (relative to 2013)        |         | 2012 (relative to 2013)        |         |
|--------------------------------------------------------------------|--------------------------------|---------|--------------------------------|---------|
|                                                                    | Estimate <sup>a</sup> (95% CI) | P-value | Estimate <sup>a</sup> (95% CI) | P-value |
| Overall                                                            | 0.17 (-1.42, 1.76)             | 0.833   | 1.53 (-0.48, 3.55)             | 0.145   |
| 0-4 yrs                                                            | -0.21 (-2.91, 2.5)             | 0.882   | 0.26 (-2.1, 2.62)              | 0.833   |
| 5-9 yrs                                                            | -0.31 (-4.85, 4.23)            | 0.896   | 1.23 (-3.08, 5.53)             | 0.579   |
| 10-14 yrs <sup>b</sup>                                             | 1.09 (-2.01, 4.18)             | 0.497   | 3.78 (0.6, 6.96)               | 0.026   |
| Female                                                             | 1.2 (-1.85, 4.26)              | 0.445   | 1.37 (-2.59, 5.33)             | 0.503   |
| Male                                                               | -0.82 (-3.13, 1.49)            | 0.49    | 1.75 (-0.18, 3.68)             | 0.084   |
| Non-Hispanic White                                                 | 0.41 (-1.93, 2.76)             | 0.732   | 0.71 (-1.99, 3.4)              | 0.611   |
| Non-Hispanic Black                                                 | -1.98 (-9.26, 5.3)             | 0.598   | 0.77 (-6.27, 7.81)             | 0.832   |
| Non-Hispanic Other <sup>c</sup>                                    | 3.44 (-4.76, 11.63)            | 0.417   | 4.39 (-3.08, 11.85)            | 0.257   |
| Hispanic                                                           | -0.42 (-4.22, 3.37)            | 0.828   | 2.05 (-2.11, 6.2)              | 0.342   |
| Metro <sup>b</sup>                                                 | 0.79 (-1.1, 2.69)              | 0.419   | 2.79 (1.02, 4.55)              | 0.004   |
| Nonmetro                                                           | -1.55 (-6.16, 3.07)            | 0.517   | -5.39 (-10.57, -0.2)           | 0.051   |
| County income: \$20,850 – 41,880                                   | 1.08 (-9.19, 11.36)            | 0.838   | 2.38 (-6.66, 11.41)            | 0.61    |
| County income: \$41,890 – 48,670                                   | -2.91 (-7.99, 2.16)            | 0.269   | 1.08 (-3.59, 5.76)             | 0.652   |
| County income: \$48,680 – 56,410                                   | 1.98 (-1.7, 5.66)              | 0.3     | -0.47 (-4.56, 3.62)            | 0.824   |
| County income: \$56,420 – 133,160 <sup>b</sup>                     | 0.91 (-1.81, 3.63)             | 0.517   | 2.96 (0.64, 5.28)              | 0.017   |
| I. Leukemias, Myeloproliferative And Myelodysplastic Diseases      | 0.82 (-1.81, 3.46)             | 0.544   | 0.66 (-2.75, 4.08)             | 0.706   |
| II. Lymphomas and reticuloendothelial neoplasms                    | 1.76 (-0.5, 4.01)              | 0.136   | -0.66 (-4.32, 3)               | 0.726   |
| III. CNS and Miscellaneous Intracranial and Intraspinial Neoplasms | 3.4 (-2.04, 8.84)              | 0.229   | 4.87 (0.05, 9.68)              | 0.056   |
| IV. Neuroblastoma And Other Peripheral Nervous Cell Tumors         | -4.36 (-11.75, 3.03)           | 0.256   | -0.42 (-7.33, 6.5)             | 0.907   |
| V. Retinoblastoma <sup>b</sup>                                     | -7.13 (-12.44, -1.82)          | 0.013   | 3.09 (-1.75, 7.93)             | 0.219   |
| VI. Renal Tumors                                                   | -3.32 (-9.36, 2.72)            | 0.289   | -5.1 (-12.79, 2.59)            | 0.202   |
| VII. Hepatic Tumors                                                | 4.36 (-15.92, 24.63)           | 0.677   | -0.72 (-21.99, 20.54)          | 0.947   |
| VIII. Malignant Bone Tumors                                        | -5.55 (-16.01, 4.92)           | 0.306   | 4.57 (-6.35, 15.5)             | 0.418   |
| IX. Soft Tissue And Other Extraosseous Sarcomas                    | -2.77 (-11.21, 5.67)           | 0.525   | 5.62 (-3.17, 14.41)            | 0.219   |
| X. Germ Cell Tumors, Trophoblastic Tumors And Neoplasms Of Gonads  | 0.61 (-9.53, 10.76)            | 0.907   | 0.04 (-10.62, 10.71)           | 0.994   |
| XI. Other Malignant Epithelial Neoplasms And Malignant Melanomas   | -2.08 (-11.23, 7.08)           | 0.659   | 2.61 (-3.98, 9.2)              | 0.443   |
| XII. Other And Unspecified Malignant Neoplasms                     | 53.08 (-5.38, 111.54)          | 0.09    | 35.93 (-26.01, 97.86)          | 0.269   |

<sup>a</sup>Estimates represent the adjusted difference in 2-year OS for the given year relative to 2013 for Medicaid expansion vs. non-expansion states.

<sup>b</sup>For these subgroups, there were statistically significant differential changes in 2-year OS between Medicaid expansion and non-expansion states during the pre-expansion period, which violates the parallel trends assumption.

°Non-Hispanic Other includes Asian, American Indian, Alaska Native, Native Hawaiian, and other Pacific Islander.



Supplementary Table 3: Characteristics of the study population by Medicaid expansion status.  
(CBTRUS: Data provided by CDC's National Program of Cancer Registries, 2011-2018)

| Subgroup                                                                | No. (%)      | Expansion states |              | Non-expansion states |             |
|-------------------------------------------------------------------------|--------------|------------------|--------------|----------------------|-------------|
|                                                                         | Total        | 2011-2013        | 2015-2018    | 2011-2013            | 2015-2018   |
| 0-4 yrs                                                                 | 21016 (44.9) | 5579 (45.7)      | 7329 (43.8)  | 3529 (46.9)          | 4579 (44.1) |
| 5-9 yrs                                                                 | 11992 (25.6) | 3143 (25.8)      | 4234 (25.3)  | 1904 (25.3)          | 2711 (26.1) |
| 10-14 yrs                                                               | 13842 (29.5) | 3483 (28.5)      | 5186 (31)    | 2086 (27.7)          | 3087 (29.7) |
| Female                                                                  | 21750 (46.4) | 5733 (47)        | 7807 (46.6)  | 3484 (46.3)          | 4726 (45.5) |
| Male                                                                    | 25100 (53.6) | 6472 (53)        | 8942 (53.4)  | 4035 (53.7)          | 5651 (54.5) |
| Non-Hispanic White                                                      | 26576 (56.7) | 6774 (55.5)      | 9024 (53.9)  | 4620 (61.4)          | 6158 (59.3) |
| Non-Hispanic Black                                                      | 5784 (12.3)  | 1130 (9.3)       | 1419 (8.5)   | 1402 (18.6)          | 1833 (17.7) |
| Non-Hispanic Other                                                      | 3633 (7.8)   | 1004 (8.2)       | 1654 (9.9)   | 352 (4.7)            | 623 (6)     |
| Hispanic                                                                | 10857 (23.2) | 3297 (27)        | 4652 (27.8)  | 1145 (15.2)          | 1763 (17)   |
| County income: \$20,850 – 41,880                                        | 3322 (7.1)   | 422 (3.5)        | 519 (3.1)    | 1026 (13.6)          | 1355 (13.1) |
| County income: \$41,890 – 48,670                                        | 7382 (15.8)  | 1296 (10.6)      | 1842 (11)    | 1866 (24.8)          | 2378 (22.9) |
| County income: \$48,680 – 56,410                                        | 10951 (23.4) | 2070 (17)        | 2875 (17.2)  | 2450 (32.6)          | 3556 (34.3) |
| County income: \$56,420 – 133,160                                       | 25195 (53.8) | 8417 (69)        | 11513 (68.7) | 2177 (29)            | 3088 (29.8) |
| Metropolitan                                                            | 40170 (85.7) | 10879 (89.1)     | 14938 (89.2) | 6003 (79.8)          | 8350 (80.5) |
| Nonmetropolitan                                                         | 6680 (14.3)  | 1326 (10.9)      | 1811 (10.8)  | 1516 (20.2)          | 2027 (19.5) |
| I. Leukemias, myeloproliferative diseases, and myelodysplastic diseases | 14358 (30.6) | 3868 (31.7)      | 5151 (30.8)  | 2234 (29.7)          | 3105 (29.9) |
| II. Lymphomas and reticuloendothelial neoplasms                         | 6120 (13.1)  | 1636 (13.4)      | 2210 (13.2)  | 925 (12.3)           | 1349 (13)   |
| III. CNS and miscellaneous intracranial and intraspinal neoplasms       | 9612 (20.5)  | 2515 (20.6)      | 3304 (19.7)  | 1611 (21.4)          | 2182 (21)   |
| IV. Neuroblastoma and other peripheral nervous cell tumors              | 3125 (6.7)   | 781 (6.4)        | 1063 (6.3)   | 560 (7.4)            | 721 (6.9)   |
| V. Retinoblastoma                                                       | 1151 (2.5)   | 319 (2.6)        | 403 (2.4)    | 182 (2.4)            | 247 (2.4)   |
| VI. Renal tumors                                                        | 2482 (5.3)   | 609 (5)          | 863 (5.2)    | 426 (5.7)            | 584 (5.6)   |
| VII. Hepatic tumors                                                     | 882 (1.9)    | 248 (2)          | 322 (1.9)    | 134 (1.8)            | 178 (1.7)   |
| VIII. Malignant bone tumors                                             | 1994 (4.3)   | 480 (3.9)        | 751 (4.5)    | 333 (4.4)            | 430 (4.1)   |
| IX. Soft tissue and other extraosseous sarcomas                         | 2891 (6.2)   | 750 (6.1)        | 1000 (6)     | 499 (6.6)            | 642 (6.2)   |
| X. Germ cell tumors, trophoblastic tumors, and neoplasms of gonads      | 1533 (3.3)   | 375 (3.1)        | 589 (3.5)    | 246 (3.3)            | 323 (3.1)   |
| XI. Other malignant epithelial neoplasms and malignant melanomas        | 2510 (5.4)   | 590 (4.8)        | 1025 (6.1)   | 339 (4.5)            | 556 (5.4)   |
| XII. Other and unspecified malignant neoplasms                          | 192 (0.4)    | 34 (0.3)         | 68 (0.4)     | 30 (0.4)             | 60 (0.6)    |

Expansion states: AZ, AR, CA, CO, CT, DE, DC, HI, IL, IA, KY, MA, MD, MI, MN, NV, NH, NJ, NM, NY, ND, OH, OR, RI, VT, WA, and WV.

Non-expansion states: AL, FL, GA, ID, KS, ME, MS, MO, NE, NC, OK, SC, SD, TN, TX, UT, VA, WI, WY.

Supplementary Table 4: Changes in 2-year overall survival (%) associated with Medicaid expansion. (CBTRUS: Data provided by CDC's National Program of Cancer Registries, 2011-2018)

|                                       | 2-year Overall Survival before and after Medicaid Expansion |           |                    |                      |           |                     | Difference-in-Differences      |         |                                 |                    |
|---------------------------------------|-------------------------------------------------------------|-----------|--------------------|----------------------|-----------|---------------------|--------------------------------|---------|---------------------------------|--------------------|
|                                       | Expansion states                                            |           |                    | Non-expansion states |           |                     | Unadjusted                     |         | Adjusted                        |                    |
| Subgroup                              | 2011-2013                                                   | 2015-2018 | Difference         | 2011-2013            | 2015-2018 | Difference          | Estimate <sup>a</sup> (95% CI) | P-value | Estimate <sup>a</sup> (95% CI)  | P-value            |
| <b>Overall</b>                        | 89.86                                                       | 91.34     | 1.48 (0.6, 2.35)   | 89.89                | 89.94     | 0.05 (-0.84, 0.94)  | 1.43 (0.2, 2.66)               | 0.029   | 1.50 (0.37, 2.64)               | 0.014              |
| <b>Age Groups</b>                     |                                                             |           |                    |                      |           |                     |                                |         |                                 |                    |
| 0-4 years                             | 89.69                                                       | 91.1      | 1.41 (0.12, 2.7)   | 89.63                | 89.45     | -0.18 (-1.59, 1.23) | 1.59 (-0.29, 3.47)             | 0.11    | 1.57 (-0.27, 3.42)              | 0.104              |
| 5-9 years                             | 90.11                                                       | 91.5      | 1.39 (0.27, 2.51)  | 91.28                | 90.46     | -0.82 (-1.94, 0.31) | 2.21 (0.65, 3.77)              | 0.009   | 2.14 (0.77, 3.50)               | 0.004              |
| 10-14 years                           | 89.92                                                       | 91.56     | 1.64 (0.33, 2.94)  | 89.07                | 90.22     | 1.15 (-0.22, 2.52)  | 0.49 (-1.38, 2.35)             | 0.61    | 0.70 (-1.17, 2.58) <sup>b</sup> | 0.47 <sup>b</sup>  |
| <b>Sex</b>                            |                                                             |           |                    |                      |           |                     |                                |         |                                 |                    |
| Female                                | 89.9                                                        | 91.04     | 1.14 (-0.1, 2.37)  | 90.15                | 89.59     | -0.56 (-1.42, 0.29) | 1.70 (0.22, 3.18)              | 0.031   | 1.80 (0.38, 3.22)               | 0.018              |
| Male                                  | 89.83                                                       | 91.61     | 1.78 (1, 2.56)     | 89.67                | 90.24     | 0.57 (-0.71, 1.86)  | 1.20 (-0.27, 2.68)             | 0.12    | 1.26 (-0.08, 2.59)              | 0.074              |
| <b>Race/Ethnicity</b>                 |                                                             |           |                    |                      |           |                     |                                |         |                                 |                    |
| Non-Hispanic White                    | 90.67                                                       | 92.13     | 1.46 (0.38, 2.55)  | 90.43                | 90.83     | 0.4 (-0.63, 1.43)   | 1.07 (-0.41, 2.54)             | 0.17    | 1.13 (-0.22, 2.48)              | 0.11               |
| Non-Hispanic Black                    | 86.46                                                       | 88.61     | 2.15 (-0.89, 5.2)  | 86.8                 | 85.72     | -1.09 (-3.27, 1.1)  | 3.24 (-0.45, 6.94)             | 0.095   | 3.63 (-0.19, 7.45)              | 0.071              |
| Non-Hispanic Other                    | 90.84                                                       | 91.8      | 0.96 (-0.8, 2.73)  | 90.34                | 89.87     | -0.47 (-4.69, 3.74) | 1.44 (-3.05, 5.92)             | 0.54    | 1.65 (-3.15, 6.44)              | 0.51               |
| Hispanic                              | 89.08                                                       | 90.48     | 1.4 (0.22, 2.58)   | 91.35                | 91.26     | -0.09 (-1.76, 1.58) | 1.49 (-0.52, 3.5)              | 0.16    | 1.24 (-0.76, 3.24)              | 0.23               |
| <b>Rural/Urban Continuum Code</b>     |                                                             |           |                    |                      |           |                     |                                |         |                                 |                    |
| Metropolitan                          | 90.08                                                       | 91.36     | 1.28 (0.4, 2.15)   | 90.1                 | 90.08     | -0.03 (-0.89, 0.84) | 1.30 (0.09, 2.51)              | 0.042   | 1.42 (0.26, 2.57) <sup>b</sup>  | 0.021 <sup>b</sup> |
| Nonmetropolitan                       | 88.08                                                       | 91.22     | 3.13 (1.06, 5.21)  | 89.05                | 89.39     | 0.34 (-2.05, 2.72)  | 2.80 (-0.31, 5.90)             | 0.088   | 2.45 (-0.44, 5.35)              | 0.11               |
| <b>Median County Household Income</b> |                                                             |           |                    |                      |           |                     |                                |         |                                 |                    |
| County income: \$20,850 – 41,880      | 85.07                                                       | 90.45     | 5.38 (3.75, 7.01)  | 88.69                | 88.7      | 0 (-1.71, 1.72)     | 5.38 (3.06, 7.70)              | <.001   | 5.12 (2.59, 7.65)               | <.001              |
| County income: \$41,890 – 48,670      | 88.35                                                       | 90.39     | 2.04 (-0.05, 4.13) | 89.12                | 89.22     | 0.1 (-2.06, 2.26)   | 1.93 (-1.02, 4.89)             | 0.21    | 1.81 (-1.30, 4.92)              | 0.26               |

|                                                                                  |       |       |                        |       |       |                      |                      |       |                                 |                    |
|----------------------------------------------------------------------------------|-------|-------|------------------------|-------|-------|----------------------|----------------------|-------|---------------------------------|--------------------|
| County income:<br>\$48,680 – 56,410                                              | 90.82 | 91.58 | 0.76 (-1.48, 3)        | 90.37 | 89.8  | -0.56 (-1.78, 0.66)  | 1.32 (-1.19, 3.83)   | 0.31  | 1.39 (-1.02, 3.80)              | 0.27               |
| County income:<br>\$56,420 – 133,160                                             | 90.1  | 91.48 | 1.37 (0.54, 2.21)      | 90.58 | 91.21 | 0.62 (-0.45, 1.7)    | 0.75 (-0.59, 2.09)   | 0.28  | 0.79 (-0.49, 2.07) <sup>b</sup> | 0.23 <sup>b</sup>  |
| <b>Histopathologic<br/>group (Defined by<br/>ICCC)</b>                           |       |       |                        |       |       |                      |                      |       |                                 |                    |
| Leukemias,<br>myeloproliferative<br>diseases, and<br>myelodysplastic<br>diseases | 92.58 | 92.65 | 0.07 (-0.91, 1.05)     | 91.45 | 90.95 | -0.5 (-2.88, 1.89)   | 0.57 (-1.96, 3.10)   | 0.66  | 0.76 (-1.96, 3.47)              | 0.59               |
| Lymphomas and<br>reticuloendothelial<br>neoplasms                                | 96.03 | 95.51 | -0.51 (-1.32, 0.3)     | 95.89 | 95.3  | -0.59 (-2.01, 0.82)  | 0.08 (-1.52, 1.68)   | 0.92  | 0.05 (-1.55, 1.65)              | 0.95               |
| CNS and<br>miscellaneous<br>intracranial and<br>intraspinial<br>neoplasms        | 80.83 | 85.38 | 4.54 (2.09, 7)         | 81.94 | 84.55 | 2.61 (0.92, 4.3)     | 1.93 (-1.01, 4.87)   | 0.21  | 1.56 (-1.54, 4.66)              | 0.33               |
| Neuroblastoma and<br>other peripheral<br>nervous cell tumors                     | 89.88 | 91.67 | 1.79 (-0.73, 4.31)     | 88.21 | 89.88 | 1.67 (-1.41, 4.75)   | 0.12 (-3.80, 4.04)   | 0.95  | 0.16 (-3.85, 4.18)              | 0.94               |
| Retinoblastoma                                                                   | 96.87 | 97.07 | 0.2 (-1.71, 2.11)      | 97.8  | 97.65 | -0.15 (-2.47, 2.17)  | 0.35 (-2.61, 3.31)   | 0.82  | 0.2 (-3.04, 3.44) <sup>b</sup>  | 0.90 <sup>b</sup>  |
| Renal tumors                                                                     | 93.92 | 94.37 | 0.44 (-1.69, 2.58)     | 96.95 | 91.97 | -4.98 (-6.74, -3.21) | 5.42 (2.69, 8.15)    | <.001 | 4.98 (2.26, 7.71) <sup>b</sup>  | 0.001 <sup>b</sup> |
| Hepatic tumors                                                                   | 83.87 | 86.02 | 2.15 (-2.55, 6.84)     | 85.07 | 78.7  | -6.38 (-13.1, 0.35)  | 8.52 (0.47, 16.58)   | 0.046 | 7.44 (-1.78, 16.66)             | 0.12               |
| Malignant bone<br>tumors                                                         | 86.25 | 89.09 | 2.84 (-0.6, 6.27)      | 88.89 | 84.41 | -4.48 (-9.01, 0.06)  | 7.31 (1.72, 12.91)   | 0.015 | 5.91 (0.09, 11.73)              | 0.046              |
| Soft tissue and other<br>extraosseous<br>sarcomas                                | 85.6  | 87.18 | 1.58 (-0.83, 3.99)     | 86.57 | 87.38 | 0.81 (-2.35, 3.97)   | 0.77 (-3.14, 4.67)   | 0.70  | 0.82 (-3.06, 4.70)              | 0.68               |
| Germ cell tumors,<br>trophoblastic tumors,<br>and neoplasms of<br>gonads         | 93.07 | 94.16 | 1.1 (-1.43, 3.62)      | 93.9  | 93.1  | -0.8 (-3.7, 2.09)    | 1.90 (-1.88, 5.68)   | 0.33  | 1.62 (-2.18, 5.41)              | 0.41               |
| Other malignant<br>epithelial neoplasms<br>and malignant<br>melanomas            | 94.92 | 96.05 | 1.14 (-1.28, 3.56)     | 95.87 | 95.88 | 0.01 (-2.55, 2.57)   | 1.13 (-2.34, 4.60)   | 0.53  | 1.43 (-2.07, 4.92)              | 0.43               |
| Other and<br>unspecified<br>malignant neoplasms                                  | 79.41 | 85.35 | 5.94 (-9.05,<br>20.94) | 86.67 | 91.23 | 4.56 (-2.87, 11.99)  | 1.38 (-15.11, 17.87) | 0.87  | 1.76 (-17.19,<br>20.71)         | 0.86               |

<sup>a</sup>An estimate  $>0$  favors Medicaid expansion states.

<sup>b</sup>The pre-expansion trends in 2-year overall survival were divergent for subgroup analyses for 10-14 year-old children, metropolitan residents, residents of counties with the highest quartile of county income, and children with renal tumors and retinoblastoma, raising concerns about the plausibility of the parallel trends assumption in these subgroup analyses. As such, the aforementioned subgroup analyses should be interpreted with caution.

Supplementary Table 5: Sensitivity Analyses of Changes in 2-year overall survival (%) associated with Medicaid expansion. (CBTRUS: Data provided by CDC’s National Program of Cancer Registries, 2009-2018)

| Subgroup                                                           | Adjust for early Medicaid expansion status (note additional years of data, 2009-2018) |                    | Include states that expanded Medicaid in 2015-2017 |                    |
|--------------------------------------------------------------------|---------------------------------------------------------------------------------------|--------------------|----------------------------------------------------|--------------------|
|                                                                    | Estimate <sup>a</sup> (95% CI)                                                        | P-value            | Estimate <sup>a</sup> (95% CI)                     | P-value            |
| Overall                                                            | 1.42 (0.34, 2.51)                                                                     | 0.015              | 1.48 (0.4, 2.56)                                   | 0.011              |
| 0-4 yrs                                                            | 1.61 (-0.13, 3.36)                                                                    | 0.079              | 1.7 (-0.1, 3.5)                                    | 0.073              |
| 5-9 yrs                                                            | 1.96 (0.57, 3.34)                                                                     | 0.009              | 1.87 (0.52, 3.22)                                  | 0.01               |
| 10-14 yrs                                                          | 0.55 (-0.89, 1.98) <sup>b</sup>                                                       | 0.46 <sup>b</sup>  | 0.63 (-1.19, 2.44) <sup>b</sup>                    | 0.504 <sup>b</sup> |
| Female                                                             | 1.15 (-0.04, 2.35)                                                                    | 0.068              | 1.77 (0.43, 3.11)                                  | 0.014              |
| Male                                                               | 1.68 (0.4, 2.96)                                                                      | 0.014              | 1.22 (-0.07, 2.52) <sup>b</sup>                    | 0.072 <sup>b</sup> |
| Non-Hispanic White                                                 | 1.25 (-0.03, 2.53)                                                                    | 0.064              | 1.18 (-0.09, 2.44)                                 | 0.078              |
| Non-Hispanic Black                                                 | 3.34 (-0.12, 6.8)                                                                     | 0.067              | 2.97 (-0.46, 6.4)                                  | 0.098              |
| Non-Hispanic Other                                                 | 2.72 (-1.9, 7.34)                                                                     | 0.257              | 2.11 (-2.72, 6.94)                                 | 0.397              |
| Hispanic                                                           | 0.25 (-1.78, 2.27) <sup>b</sup>                                                       | 0.813 <sup>b</sup> | 1.16 (-0.81, 3.13)                                 | 0.256              |
| Metro                                                              | 1.43 (0.34, 2.51) <sup>b</sup>                                                        | 0.015 <sup>b</sup> | 1.36 (0.27, 2.45) <sup>b</sup>                     | 0.02 <sup>b</sup>  |
| Nonmetro                                                           | 1.76 (-1.02, 4.54)                                                                    | 0.224              | 2.65 (-0.29, 5.58)                                 | 0.086              |
| County income: \$20,850 – 41,880                                   | 5.2 (2.22, 8.19)                                                                      | 0.002              | 3.67 (1.47, 5.87)                                  | 0.003              |
| County income: \$41,890 – 48,670                                   | 1.2 (-1.15, 3.56)                                                                     | 0.325              | 1.81 (-1.12, 4.74)                                 | 0.235              |
| County income: \$48,680 – 56,410                                   | 0.98 (-1.19, 3.15)                                                                    | 0.384              | 1.87 (-0.56, 4.3)                                  | 0.14               |
| County income: \$56,420 – 133,160                                  | 1.3 (0.11, 2.49) <sup>b</sup>                                                         | 0.04 <sup>b</sup>  | 0.67 (-0.57, 1.91) <sup>b</sup>                    | 0.294 <sup>b</sup> |
| I. Leukemias, Myeloproliferative And Myelodysplastic Diseases      | 1.4 (-0.86, 3.67)                                                                     | 0.233              | 0.77 (-1.92, 3.45)                                 | 0.579              |
| II. Lymphomas and reticuloendothelial neoplasms                    | 1.11 (-0.46, 2.68) <sup>b</sup>                                                       | 0.176 <sup>b</sup> | 0.3 (-1.31, 1.91)                                  | 0.715              |
| III. CNS and Miscellaneous Intracranial and Intraspinial Neoplasms | 0.43 (-2.21, 3.08)                                                                    | 0.749              | 1.46 (-1.38, 4.3) <sup>b</sup>                     | 0.32 <sup>b</sup>  |
| IV. Neuroblastoma And Other Peripheral Nervous Cell Tumors         | 0.78 (-3.03, 4.6)                                                                     | 0.689              | 0.57 (-3.49, 4.63)                                 | 0.785              |
| V. Retinoblastoma                                                  | -0.48 (-2.86, 1.9) <sup>b</sup>                                                       | 0.696 <sup>b</sup> | 0.44 (-2.67, 3.55) <sup>b</sup>                    | 0.783 <sup>b</sup> |
| VI. Renal Tumors                                                   | 4.73 (2.08, 7.38)                                                                     | 0.001              | 5.01 (2.41, 7.6)                                   | 0.001              |
| VII. Hepatic Tumors                                                | 1.23 (-8.23, 10.69)                                                                   | 0.801              | 6.31 (-2.7, 15.32)                                 | 0.178              |
| VIII. Malignant Bone Tumors                                        | 5.2 (0.34, 10.06)                                                                     | 0.044              | 6.04 (0.53, 11.55)                                 | 0.038              |
| IX. Soft Tissue And Other Extrasosseous Sarcomas                   | 1.25 (-2.58, 5.08)                                                                    | 0.525              | 0.54 (-3.23, 4.3)                                  | 0.781              |
| X. Germ Cell Tumors, Trophoblastic Tumors And Neoplasms Of Gonads  | 1.45 (-1.85, 4.76)                                                                    | 0.394              | 1.23 (-2.52, 4.99)                                 | 0.525              |
| XI. Other Malignant Epithelial Neoplasms And Malignant Melanomas   | 1.24 (-1.79, 4.27)                                                                    | 0.427              | 1.04 (-2.39, 4.46)                                 | 0.557              |
| XII. Other And Unspecified Malignant Neoplasms                     | 2.81 (-11, 16.63)                                                                     | 0.693              | 4.93 (-12.13, 21.98)                               | 0.576              |

<sup>a</sup>An estimate  $>0$  favors Medicaid expansion states.

<sup>b</sup>The pre-expansion trends in 2-year overall survival were divergent for these subgroups, raising concerns about the plausibility of the parallel trends assumption in these subgroup analyses. As such, these subgroup analyses should be interpreted with caution.

Supplementary Figure 1: Derivation of the final sample. (CBTRUS: Data provided by CDC's National Program of Cancer Registries, 2011-2018)

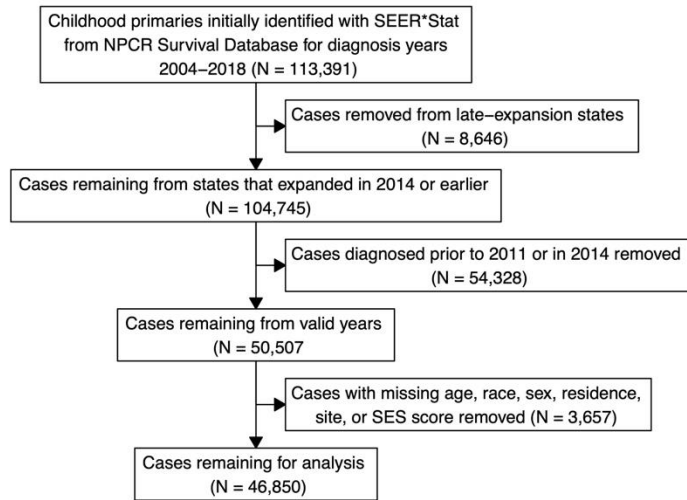

Supplementary Figure 2: Temporal Trends in 2-year Overall Survival by State Medicaid Expansion Status and Sociodemographic Subgroups. (CBTRUS: Data provided by CDC's National Program of Cancer Registries, 2011-2018)

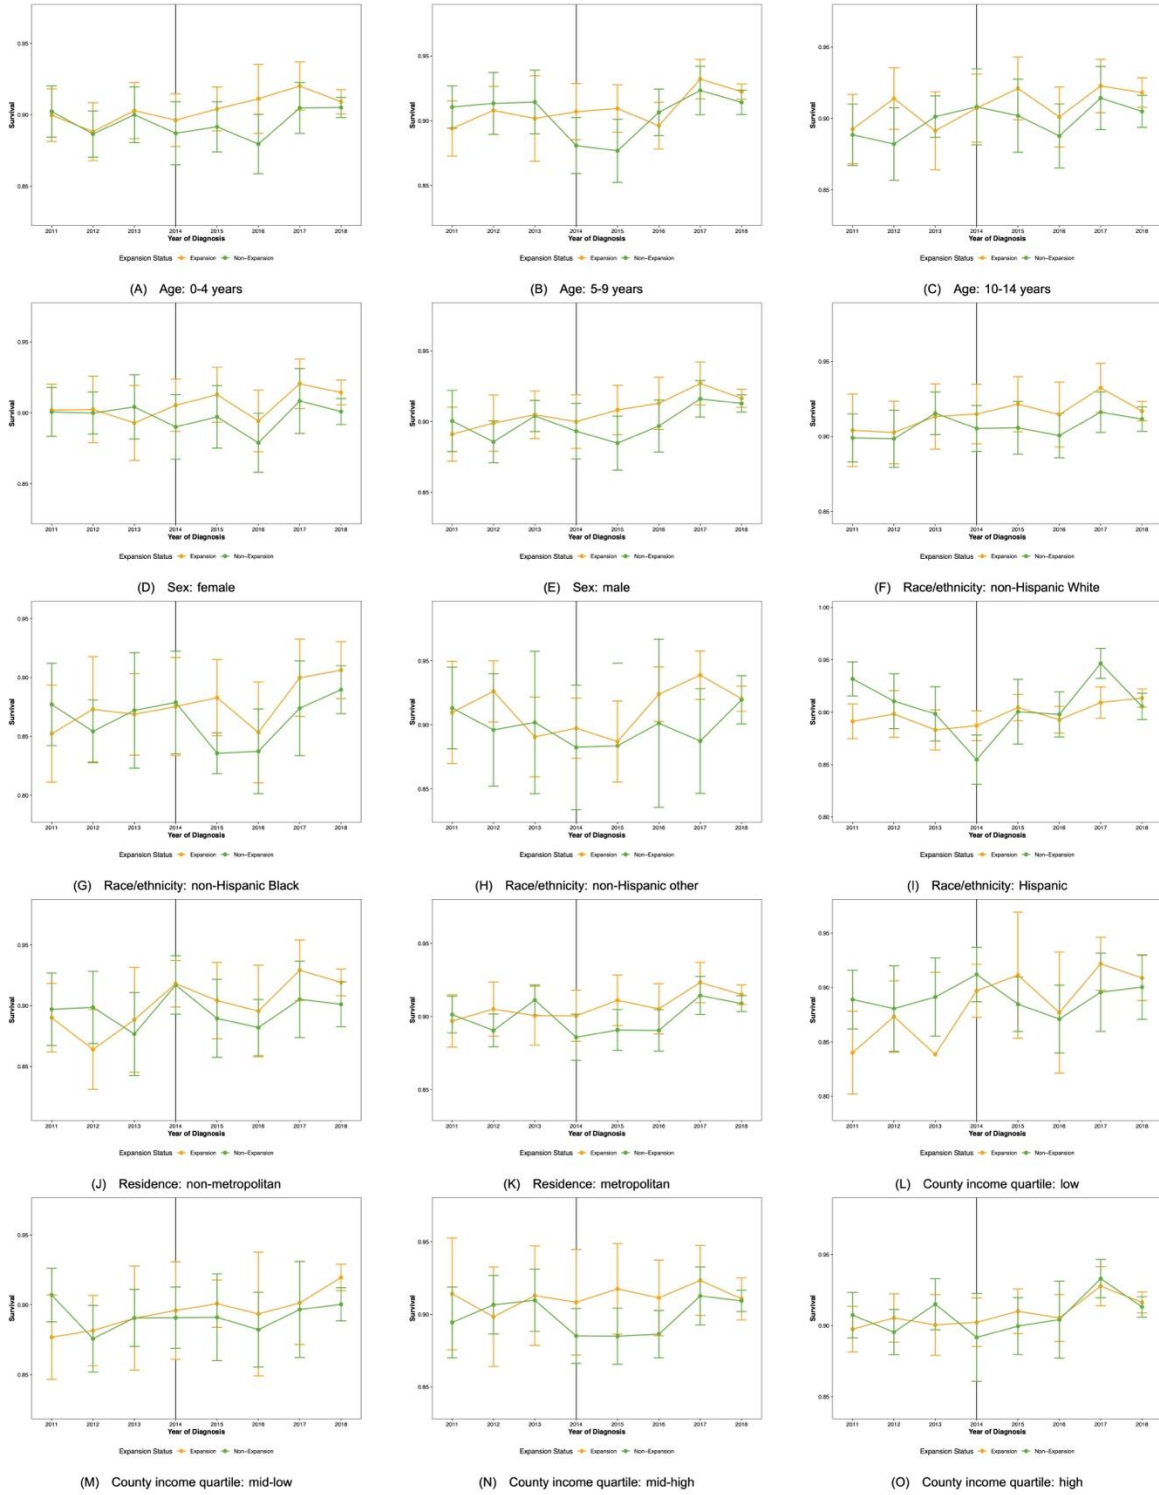



Supplementary Figure 3: Temporal Trends in 2-year Overall Survival by State Medicaid Expansion Status and Cancer Type Subgroups. (CBTRUS: Data provided by CDC's National Program of Cancer Registries, 2011-2018)

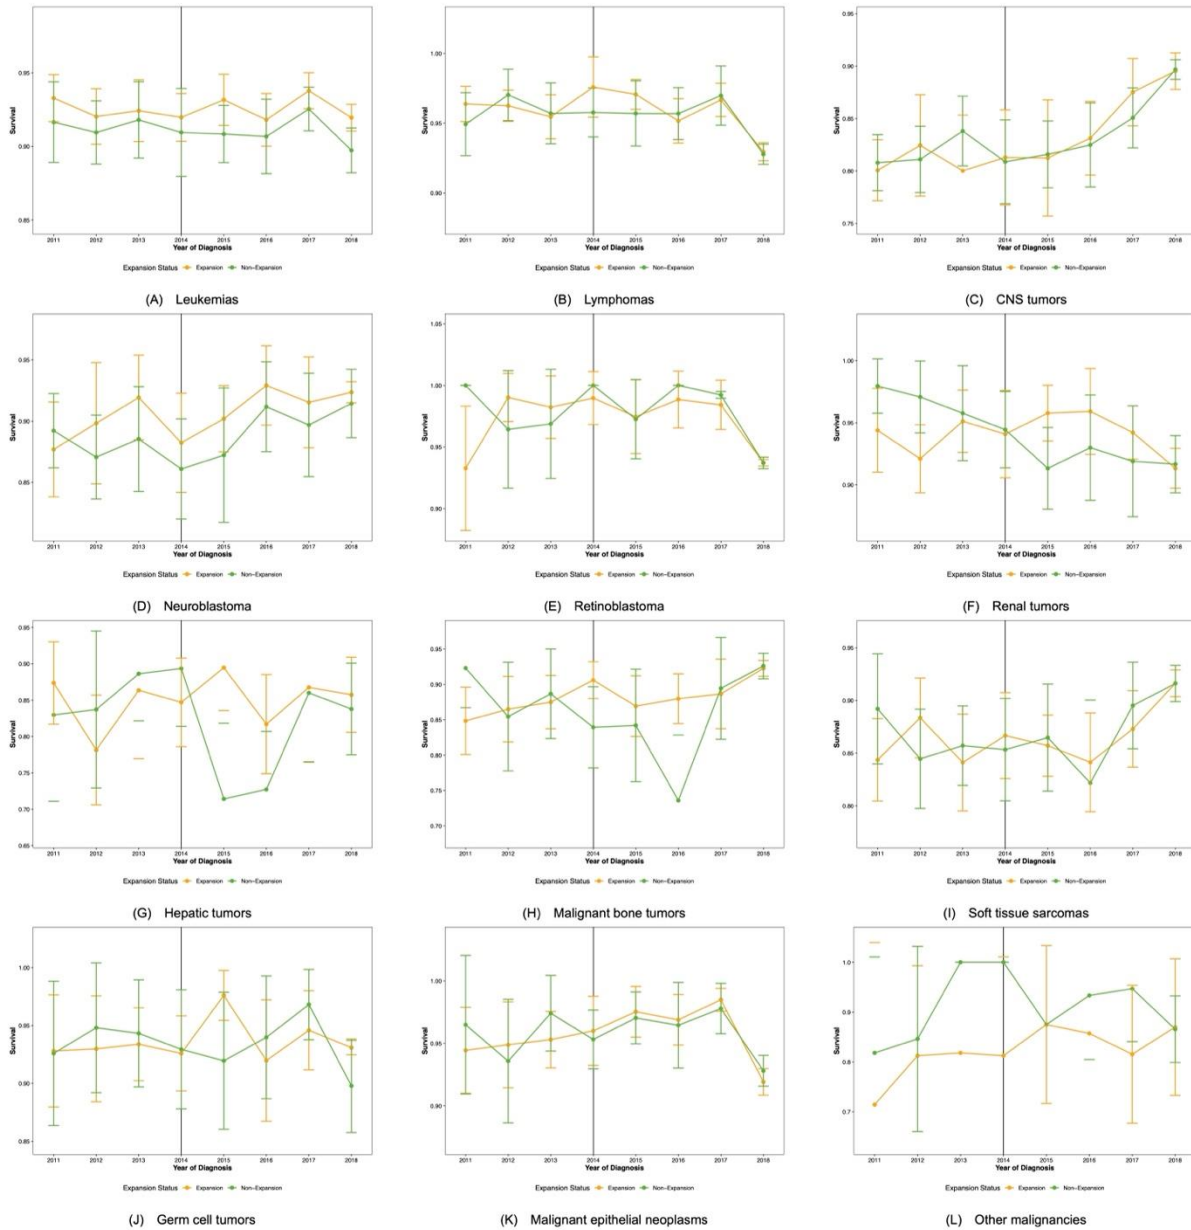

Supplement: djad024_supplementary_data.pdf [file djad024_supplementary_data.pdf]
